# Supplementary material for: Characterization of the interfacial Li-ion exchange process in a ceramic–polymer composite by solid state NMR
Source: Royal Society of Chemistry journal article supplement (doi:10.1039/d1ta03720j), 2021-01-01
Supplement: d1ta03720j1.pdf [file d1ta03720j1.pdf]

Supporting Information

# Characterization of the interfacial Li-ion exchange process in a ceramic-polymer composite by solid state NMR

*Pierre Ranque,<sup>a</sup> Jakub Zagórski,<sup>a,b</sup> Shanmukaraj Devaraj,<sup>a</sup> Frédéric Aguesse,<sup>a</sup> Juan Miguel López del Amo<sup>\*a</sup>*

*<sup>a</sup> Centro de Investigación Cooperativa de Energías Alternativas (CIC energiGUNE), Basque Research and Technology Alliance (BRTA), Parque Tecnológico de Alava, Albert Einstein 48, 01510 Vitoria-Gasteiz, Spain.*

*<sup>b</sup> University of the Basque Country (UPV/EHU), Barrio Sarriena, s/n, 48940 Leioa, Spain.*

**Keywords:** Li-ion exchange, composite electrolyte, solid-state NMR, solid-state batteries, LLZO, interface.

### X-ray diffraction of Ga-substituted LLZO ( $\text{Li}_{6.55}\text{Ga}_{0.15}\text{La}_3\text{Zr}_2\text{O}_{12}$ )

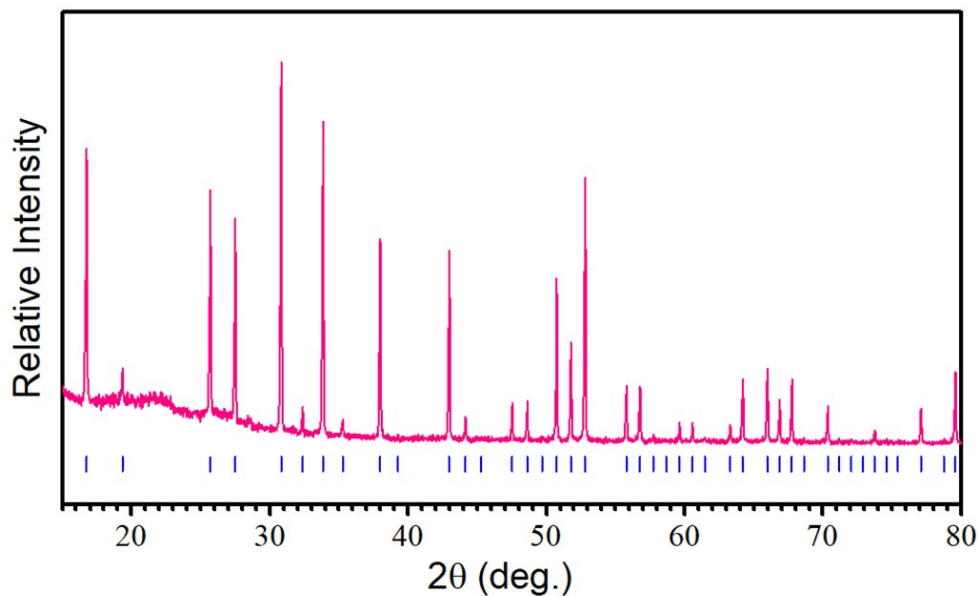

**Fig. S1** XRD of the pure cubic Ga-substituted LLZO ( $\text{Li}_{6.55}\text{Ga}_{0.15}\text{La}_3\text{Zr}_2\text{O}_{12}$ ) powder.

### Deconvolution of 1D $^7\text{Li}$ spectrum

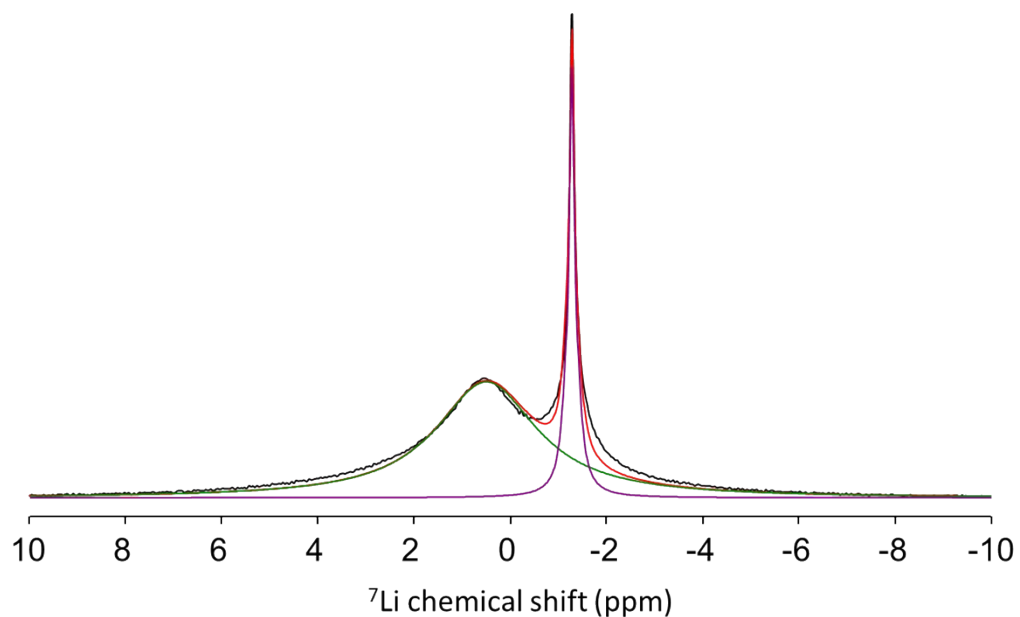

**Fig. S2** Deconvolution of  $^7\text{Li}$  1D spectrum. More than two components are necessary to fit the LLZO peak.

**$^1\text{H}$ - $^7\text{Li}$  HETCOR of the pristine LLZO powder**

In order to unequivocally demonstrate the correct assignment of the  $^1\text{H}$  resonance at 4 ppm in the  $^1\text{H}$ - $^7\text{Li}$  HETCOR correlation shown in Fig. 2b, a similar experiment was performed in a sample containing pure LLZO (no PEO:LiTFSI). The result of such experiment is shown in Fig. S3. This spectrum clearly shows the presence of two main resonances that are assigned to H at LiOH and to protons inside the LLZO structure coexisting with Li-ion. The presence of this signal in a sample without PEO clearly excludes the possibility of this correlation being originated from PEO to LLZO coupling. This result is also in agreement with the NMR characterization of a partially hydrated LLZO sample by Bernuy-Lopez *et al.*, Chem. Mater. **2014**, 26 (12), 3610-3617.

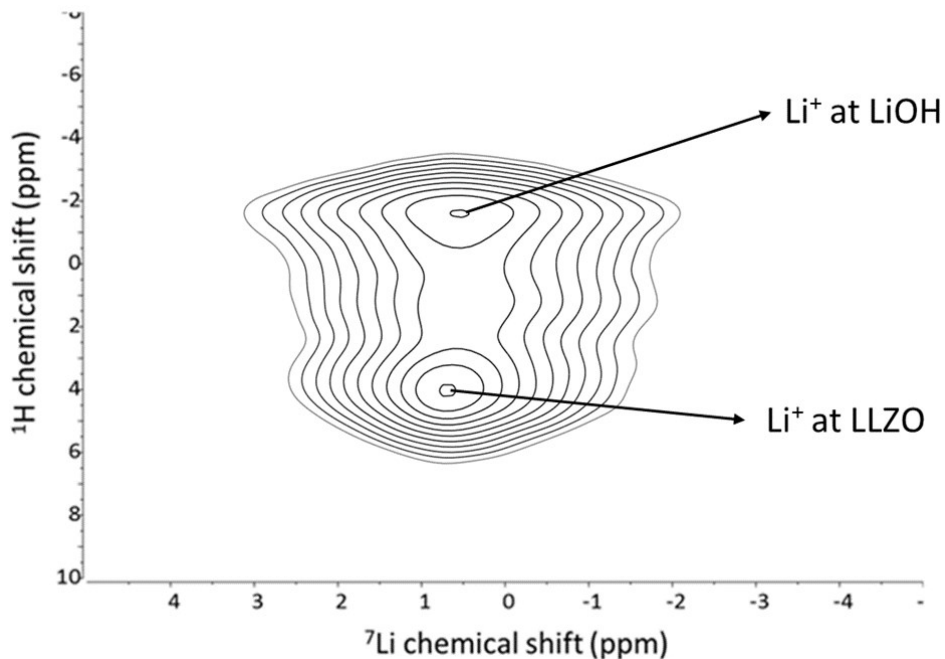

**Fig. S3**  $^1\text{H}$ - $^7\text{Li}$  HETCOR of the pristine LLZO powder.

## Curve fitting results of cross-peaks intensities vs. mixing time from $^7\text{Li}$ - $^7\text{Li}$ EXSY (1.3 mm rotor)

**Table S1** 1.3 mm rotor  $^7\text{Li}$ - $^7\text{Li}$  EXSY fitting results.

| Model           | ExpDec1                    |          |                |
|-----------------|----------------------------|----------|----------------|
| Equation        | $y = A_1 \exp(-x/t) + y_0$ |          |                |
| Reduced Chi-Sqr | 5.4299E-4                  |          |                |
| Adj. R-Square   | 0.98769                    |          |                |
|                 |                            | Value    | Standard Error |
| B               | <b>y0</b>                  | 1.00155  | 0.02067        |
|                 | <b>A<sub>1</sub></b>       | -0.56144 | 0.02554        |
|                 | <b>t</b>                   | 0.03557  | 0.00477        |
|                 | <b>k</b>                   | 28.1098  | 3.7679         |
|                 | <b>tau</b>                 | 0.02466  | 0.00331        |

### Estimation of the time necessary to have an efficient Li-ion mobility within the composite electrolyte via EIS

The bulk conductivity of the composite electrolyte (*i.e.* the resistance-capacitance semi-circle visible at high frequencies) is observed between 1 MHz and 5000 Hz in our EIS measurements, as shown Fig. S4. From these frequency values, it is possible to estimate the time necessary to have an efficient Li-ion mobility within the composite. In this case, at room temperature, we calculated the time taken to participate in the bulk conductivity of the composite as 0.2 ms ( $1/5000 = 0.0002$ ), which is more rapid than the time taken for the spontaneous exchange at the interface (150 ms), as obtained from NMR studies.

## Supporting Information

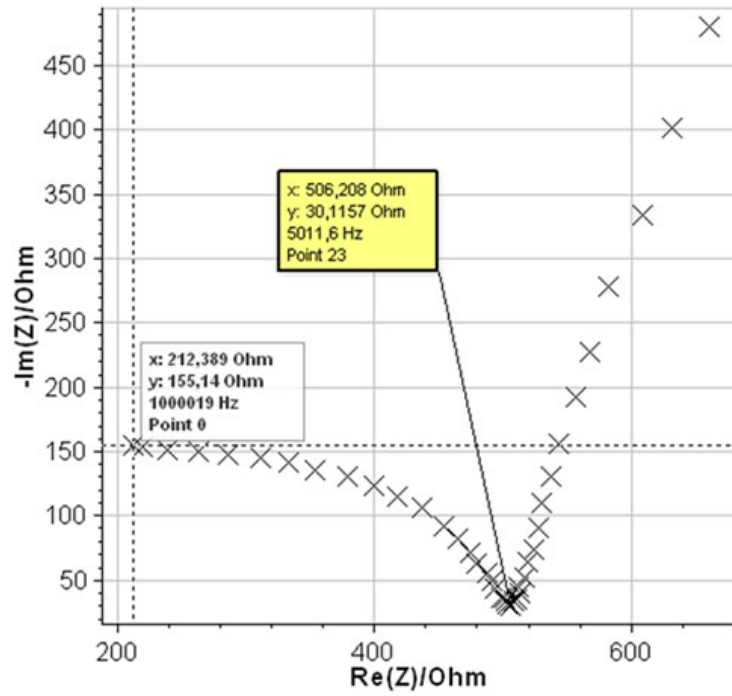

**Fig. S4** EIS spectrum of a PEO:LiTFSI + 10 vol% LLZO composite membrane at room temperature. The bulk conductivity is observed at frequencies above 5000 Hz.
